# Supplementary material
Source: publisher figshare collection journal article supplement (https://asha.figshare.com/ndownloader/files/28909665)
Supplement: Supplementary file [file 28909665]

## Supplementary Tables

This supplement contains descriptive statistics for measures of swallowing based on duplicated blinded review of videofluoroscopies, performed according to the ASPEKT Method (Steele et al., 2019). For continuous parameters, means and standard deviations are reported, as well as percentile values. For categorical parameters, values for percentiles are reported.

The parameters of interest are as follows:

- sip volume, milliliters;
- the number of swallows per bolus;
- the Penetration-Aspiration Scale (Rosenbek et al., 1996) score seen on the initial swallow of each bolus;
- the worst (i.e. maximum) Penetration-Aspiration Scale score seen across all swallows for each bolus;
- laryngeal vestibule closure (LVC) integrity (complete, partial or incomplete);
- swallow reaction time (defined as the interval between bolus passing mandible and onset of the hyoid burst), in milliseconds;
- the hyoid-burst-onset-to-upper-esophageal-sphincter-opening interval, in milliseconds;
- upper esophageal sphincter (UES) opening duration, in milliseconds;
- time-to-LVC, in milliseconds, defined as the interval between onset of the hyoid burst and the first frame of most-complete LVC;
- LVC duration, in milliseconds;
- vallecular residue area, pyriform sinus residue area, other pharyngeal residue area and total pharyngeal residue (calculated as the sum of vallecular, pyriform sinus and other pharyngeal residue area), measured in anatomically-scaled units, i.e.  $\%(C2-4)^2$  units;
- pharyngeal area on the frame of maximum pharyngeal constriction ("PhAMPC"), in  $\%(C2-4)^2$  units; and
- UES diameter at maximum distension, in  $\%(C2-4)$  units.

It should be noted that measures of pharyngeal area at rest, bolus location at swallow onset, and hyoid kinematics are included in the ASPEKT method but are not included in this manuscript. Supplementary Table 1 contains data for the original reference sample of 38 healthy adults aged under 60 years of age described by Steele and colleagues (Steele et al., 2019). The data in these tables expand upon the descriptive statistics of means and standard deviations provided in the original article. Additional information regarding the ASPEKT method can be found in the original article (Steele et al., 2019).

In the current study, these healthy reference values were used to classify data from two new cohorts (a cohort of healthy older adults and a cohort of adults with Parkinson Disease), using the following classifications:

- Abnormal (low): Below the 5<sup>th</sup> percentile of the healthy reference range;
- Atypical (low): Below the 25<sup>th</sup> percentile of the healthy reference range;
- Typical: Within the healthy reference interquartile range, i.e., between the 25<sup>th</sup> and 75<sup>th</sup> percentiles;
- Atypical (high): Above the 75<sup>th</sup> percentile of the healthy reference range;

- Abnormal (high): Above the 95<sup>th</sup> percentile of the healthy reference range.

Supplementary Tables 2 and 3 contain descriptive statistics for healthy older cohort and the participants with PD, respectively.

**References:**

- Rosenbek, J. C., Robbins, J. A., Roecker, E. B., Coyle, J. L., & Wood, J. L. (1996). A penetration–aspiration scale. *Dysphagia*, 11(2), 93–98.
- Steele, C. M., et al. (2019). Reference values for healthy swallowing across the range from thin to extremely thick liquids. *Journal of Speech, Language, and Hearing Research*, 62(5), 1338-1363. [https://doi.org/10.1044/2019\\_JSLHR-S-18-0448](https://doi.org/10.1044/2019_JSLHR-S-18-0448)

Supplementary Table 1. Descriptive statistics for the healthy reference sample aged < 60 years of age, studied by Steele et al. (2019).

| <b><u>Parameter</u></b>            | <b><u>Unit</u></b> | <b><u>Consistency</u></b> | <b><u>Mean</u></b> | <b><u>Standard<br/>Deviation</u></b> | <b><u>p5</u></b> | <b><u>p25</u></b> | <b><u>p50</u></b> | <b><u>p75</u></b> | <b><u>p95</u></b> |
|------------------------------------|--------------------|---------------------------|--------------------|--------------------------------------|------------------|-------------------|-------------------|-------------------|-------------------|
| Sip Volume                         | ml                 | Thin                      | 11                 | 5                                    | 4                | 8                 | 11                | 15                | 20                |
|                                    |                    | Slightly thick            | 9                  | 4                                    | 3                | 6                 | 9                 | 12                | 16                |
|                                    |                    | Mildly thick              | 9                  | 4                                    | 3                | 6                 | 8                 | 11                | 18                |
|                                    |                    | Moderately thick          | 5                  | 3                                    | 2                | 3                 | 4                 | 6                 | 11                |
|                                    |                    | Extremely thick           | 5                  | 3                                    | 2                | 3                 | 5                 | 6                 | 10                |
| Number of<br>Swallows per<br>Bolus | Number             | Thin                      | 1                  | 1                                    | 1                | 1                 | 1                 | 1                 | 2                 |
|                                    |                    | Slightly thick            | 1                  | 0                                    | 1                | 1                 | 1                 | 1                 | 2                 |
|                                    |                    | Mildly thick              | 1                  | 1                                    | 1                | 1                 | 1                 | 1                 | 2                 |
|                                    |                    | Moderately thick          | 1                  | 0                                    | 1                | 1                 | 1                 | 1                 | 2                 |
|                                    |                    | Extremely thick           | 1                  | 1                                    | 1                | 1                 | 1                 | 1                 | 2                 |

|                                                    |                                     |                  |     |     |          |          |          |          |          |
|----------------------------------------------------|-------------------------------------|------------------|-----|-----|----------|----------|----------|----------|----------|
| Penetration-<br>Aspiration Scale<br>Score          | Categorical<br>Score 1-8            | Thin             | N/A | N/A | 1        | 1        | 1        | 1        | 2        |
|                                                    |                                     | Slightly thick   | N/A | N/A | 1        | 1        | 1        | 1        | 2        |
|                                                    |                                     | Mildly thick     | N/A | N/A | 1        | 1        | 1        | 1        | 1        |
|                                                    |                                     | Moderately thick | N/A | N/A | 1        | 1        | 1        | 1        | 1        |
|                                                    |                                     | Extremely thick  | N/A | N/A | 1        | 1        | 1        | 1        | 1        |
| Worst<br>Penetration-<br>Aspiration Scale<br>Score | Categorical<br>Score 1-8            | Thin             | N/A | N/A | 1        | 1        | 1        | 1        | 2        |
|                                                    |                                     | Slightly thick   | N/A | N/A | 1        | 1        | 1        | 1        | 2        |
|                                                    |                                     | Mildly thick     | N/A | N/A | 1        | 1        | 1        | 1        | 2        |
|                                                    |                                     | Moderately thick | N/A | N/A | 1        | 1        | 1        | 1        | 2        |
|                                                    |                                     | Extremely thick  | N/A | N/A | 1        | 1        | 1        | 1        | 1        |
| LVC Integrity                                      | Complete/<br>Partial/<br>Incomplete | Thin             | N/A | N/A | Complete | Complete | Complete | Complete | Complete |
|                                                    |                                     | Slightly thick   | N/A | N/A | Complete | Complete | Complete | Complete | Complete |
|                                                    |                                     | Mildly thick     | N/A | N/A | Complete | Complete | Complete | Complete | Complete |
|                                                    |                                     | Moderately thick | N/A | N/A | Complete | Complete | Complete | Complete | Complete |
|                                                    |                                     | Extremely thick  | N/A | N/A | Complete | Complete | Complete | Complete | Complete |

|                                                |    |                  |     |     |     |     |     |     |      |
|------------------------------------------------|----|------------------|-----|-----|-----|-----|-----|-----|------|
| Swallow<br>Reaction Time                       | ms | Thin             | 130 | 183 | -67 | 0   | 67  | 167 | 577  |
|                                                |    | Slightly thick   | 179 | 260 | -33 | 0   | 67  | 267 | 797  |
|                                                |    | Mildly thick     | 205 | 286 | -33 | 0   | 100 | 300 | 914  |
|                                                |    | Moderately thick | 315 | 420 | -67 | 0   | 100 | 567 | 1208 |
|                                                |    | Extremely thick  | 364 | 509 | -67 | 0   | 67  | 617 | 1741 |
| Hyoid-Burst-to-<br>UES-Opening<br>Interval(ms) | ms | Thin             | 109 | 57  | 33  | 67  | 100 | 133 | 234  |
|                                                |    | Slightly thick   | 120 | 60  | 23  | 100 | 133 | 167 | 234  |
|                                                |    | Mildly thick     | 124 | 59  | 33  | 92  | 133 | 167 | 209  |
|                                                |    | Moderately thick | 150 | 56  | 67  | 100 | 133 | 200 | 234  |
|                                                |    | Extremely thick  | 154 | 52  | 67  | 133 | 133 | 200 | 249  |
| UES Opening<br>Duration                        | ms | Thin             | 456 | 62  | 367 | 400 | 467 | 500 | 567  |
|                                                |    | Slightly thick   | 441 | 65  | 334 | 400 | 434 | 467 | 567  |
|                                                |    | Mildly thick     | 446 | 80  | 334 | 400 | 434 | 500 | 601  |
|                                                |    | Moderately thick | 415 | 74  | 300 | 367 | 400 | 467 | 544  |
|                                                |    | Extremely thick  | 404 | 69  | 300 | 367 | 400 | 434 | 547  |

|                    |                      |                  |     |     |     |     |     |     |     |
|--------------------|----------------------|------------------|-----|-----|-----|-----|-----|-----|-----|
| Time-to-LVC        | ms                   | Thin             | 185 | 103 | 33  | 100 | 167 | 259 | 399 |
|                    |                      | Slightly thick   | 178 | 89  | 67  | 100 | 167 | 234 | 367 |
|                    |                      | Mildly thick     | 159 | 77  | 33  | 100 | 133 | 200 | 314 |
|                    |                      | Moderately thick | 154 | 63  | 67  | 100 | 133 | 200 | 267 |
|                    |                      | Extremely thick  | 147 | 57  | 67  | 100 | 133 | 167 | 267 |
| LVC Duration       | ms                   | Thin             | 460 | 162 | 300 | 367 | 434 | 500 | 691 |
|                    |                      | Slightly thick   | 446 | 172 | 267 | 367 | 417 | 500 | 701 |
|                    |                      | Mildly thick     | 453 | 134 | 300 | 367 | 434 | 509 | 667 |
|                    |                      | Moderately thick | 448 | 148 | 300 | 367 | 434 | 500 | 676 |
|                    |                      | Extremely thick  | 434 | 87  | 322 | 367 | 434 | 500 | 601 |
| Vallecular Residue | %(C2-4) <sup>2</sup> | Thin             | 0%  | 1%  | 0%  | 0%  | 0%  | 0%  | 2%  |
|                    |                      | Slightly thick   | 1%  | 1%  | 0%  | 0%  | 0%  | 1%  | 2%  |
|                    |                      | Mildly thick     | 1%  | 1%  | 0%  | 0%  | 0%  | 1%  | 3%  |
|                    |                      | Moderately thick | 0%  | 1%  | 0%  | 0%  | 0%  | 0%  | 2%  |
|                    |                      | Extremely thick  | 0%  | 1%  | 0%  | 0%  | 0%  | 0%  | 2%  |

|                          |                       |                  |    |    |    |    |    |    |    |
|--------------------------|-----------------------|------------------|----|----|----|----|----|----|----|
| Pyriform Sinus Residue   | % (C2-4) <sup>2</sup> | Thin             | 0% | 1% | 0% | 0% | 0% | 0% | 1% |
|                          |                       | Slightly thick   | 0% | 1% | 0% | 0% | 0% | 0% | 2% |
|                          |                       | Mildly thick     | 0% | 1% | 0% | 0% | 0% | 0% | 2% |
|                          |                       | Moderately thick | 0% | 0% | 0% | 0% | 0% | 0% | 1% |
|                          |                       | Extremely thick  | 0% | 0% | 0% | 0% | 0% | 0% | 1% |
| Other Pharyngeal Residue | % (C2-4) <sup>2</sup> | Thin             | 0% | 0% | 0% | 0% | 0% | 0% | 1% |
|                          |                       | Slightly thick   | 0% | 0% | 0% | 0% | 0% | 0% | 1% |
|                          |                       | Mildly thick     | 0% | 0% | 0% | 0% | 0% | 0% | 1% |
|                          |                       | Moderately thick | 0% | 0% | 0% | 0% | 0% | 0% | 1% |
|                          |                       | Extremely thick  | 0% | 0% | 0% | 0% | 0% | 0% | 1% |
| Total Pharyngeal Residue | % (C2-4) <sup>2</sup> | Thin             | 1% | 2% | 0% | 0% | 0% | 1% | 3% |
|                          |                       | Slightly thick   | 1% | 2% | 0% | 0% | 0% | 1% | 6% |
|                          |                       | Mildly thick     | 1% | 2% | 0% | 0% | 1% | 2% | 5% |
|                          |                       | Moderately thick | 1% | 1% | 0% | 0% | 0% | 1% | 2% |
|                          |                       | Extremely thick  | 1% | 1% | 0% | 0% | 0% | 1% | 3% |

|                                                  |                       |                  |     |    |     |     |     |     |     |
|--------------------------------------------------|-----------------------|------------------|-----|----|-----|-----|-----|-----|-----|
| Pharyngeal<br>Area at<br>Maximum<br>Constriction | % (C2-4) <sup>2</sup> | Thin             | 1%  | 1% | 0%  | 0%  | 0%  | 2%  | 4%  |
|                                                  |                       | Slightly thick   | 1%  | 1% | 0%  | 0%  | 0%  | 2%  | 4%  |
|                                                  |                       | Mildly thick     | 2%  | 2% | 0%  | 0%  | 1%  | 3%  | 6%  |
|                                                  |                       | Moderately thick | 1%  | 1% | 0%  | 0%  | 0%  | 1%  | 3%  |
|                                                  |                       | Extremely thick  | 1%  | 1% | 0%  | 0%  | 0%  | 1%  | 3%  |
| UES Diameter                                     | % (C2-4)              | Thin             | 21% | 7% | 10% | 16% | 20% | 25% | 32% |
|                                                  |                       | Slightly thick   | 19% | 6% | 10% | 15% | 18% | 22% | 29% |
|                                                  |                       | Mildly thick     | 18% | 5% | 11% | 14% | 18% | 22% | 27% |
|                                                  |                       | Moderately thick | 16% | 5% | 9%  | 12% | 14% | 19% | 26% |
|                                                  |                       | Extremely thick  | 17% | 5% | 9%  | 13% | 17% | 20% | 25% |

p5 = 5<sup>th</sup> percentile (p25, p50, p75, p95 = 25<sup>th</sup>, 50<sup>th</sup>, 75<sup>th</sup>, 95<sup>th</sup> percentiles); ml = milliliters; ms = milliseconds; LVC = Laryngeal Vestibule Closure; UES = Upper Esophageal Sphincter; %(C2-4)<sup>2</sup> = percent of the squared length of the C2-4 cervical spine; %(C2-4) = percent of the length of the C2-4 cervical spine; N/A = not available.



Supplementary Table 2. Descriptive statistics for videofluoroscopic measures of swallowing in healthy participants aged 53-82.

| <b><u>Parameter</u></b>            | <b><u>Unit</u></b> | <b><u>Consistency</u></b> | <b><u>Mean</u></b> | <b><u>Standard<br/>Deviation</u></b> | <b><u>p5</u></b> | <b><u>p25</u></b> | <b><u>p50</u></b> | <b><u>p75</u></b> | <b><u>p95</u></b> |
|------------------------------------|--------------------|---------------------------|--------------------|--------------------------------------|------------------|-------------------|-------------------|-------------------|-------------------|
| Sip Volume                         | ml                 | Thin                      | 16                 | 8                                    | 6                | 10                | 16                | 19                | 40                |
|                                    |                    | Slightly thick            | 13                 | 5                                    | 6                | 8                 | 11                | 17                | 23                |
|                                    |                    | Mildly thick              | 12                 | 5                                    | 5                | 9                 | 10                | 17                | 21                |
|                                    |                    | Moderately thick          | 5                  | 2                                    | 2                | 3                 | 6                 | 7                 | 10                |
|                                    |                    | Extremely thick           | 6                  | 3                                    | 2                | 4                 | 6                 | 8                 | 11                |
| Number of<br>Swallows per<br>Bolus | Number             | Thin                      | 1                  | 0                                    | 1                | 1                 | 1                 | 1                 | 2                 |
|                                    |                    | Slightly thick            | 1                  | 1                                    | 1                | 1                 | 1                 | 1                 | 3                 |
|                                    |                    | Mildly thick              | 1                  | 1                                    | 1                | 1                 | 1                 | 1                 | 3                 |
|                                    |                    | Moderately thick          | 1                  | 0                                    | 1                | 1                 | 1                 | 1                 | 1                 |
|                                    |                    | Extremely thick           | 1                  | 0                                    | 1                | 1                 | 1                 | 1                 | 3                 |

|                                                    |                                 |                  |     |     |          |          |          |          |          |
|----------------------------------------------------|---------------------------------|------------------|-----|-----|----------|----------|----------|----------|----------|
| Penetration-<br>Aspiration Scale<br>Score          | Categorical<br>Score 1-8        | Thin             | N/A | N/A | 1        | 1        | 1        | 1        | 2        |
|                                                    |                                 | Slightly thick   | N/A | N/A | 1        | 1        | 1        | 1        | 2        |
|                                                    |                                 | Mildly thick     | N/A | N/A | 1        | 1        | 1        | 1        | 2        |
|                                                    |                                 | Moderately thick | N/A | N/A | 1        | 1        | 1        | 1        | 1        |
|                                                    |                                 | Extremely thick  | N/A | N/A | 1        | 1        | 1        | 1        | 1        |
| Worst<br>Penetration-<br>Aspiration Scale<br>Score | Categorical<br>Score 1-8        | Thin             | N/A | N/A | 1        | 1        | 1        | 1        | 2        |
|                                                    |                                 | Slightly thick   | N/A | N/A | 1        | 1        | 1        | 1        | 2        |
|                                                    |                                 | Mildly thick     | N/A | N/A | 1        | 1        | 1        | 1        | 2        |
|                                                    |                                 | Moderately thick | N/A | N/A | 1        | 1        | 1        | 1        | 1        |
|                                                    |                                 | Extremely thick  | N/A | N/A | 1        | 1        | 1        | 1        | 1        |
| LVC Integrity                                      | Complete/Partial/<br>Incomplete | Thin             | N/A | N/A | Complete | Complete | Complete | Complete | Complete |
|                                                    |                                 | Slightly thick   | N/A | N/A | Complete | Complete | Complete | Complete | Complete |
|                                                    |                                 | Mildly thick     | N/A | N/A | Complete | Complete | Complete | Complete | Complete |
|                                                    |                                 | Moderately thick | N/A | N/A | Complete | Complete | Complete | Complete | Complete |
|                                                    |                                 | Extremely thick  | N/A | N/A | Complete | Complete | Complete | Complete | Complete |

|                                                |    |                  |     |     |     |     |     |     |      |
|------------------------------------------------|----|------------------|-----|-----|-----|-----|-----|-----|------|
| Swallow<br>Reaction Time                       | ms | Thin             | 270 | 315 | -70 | 83  | 200 | 267 | 1108 |
|                                                |    | Slightly thick   | 247 | 300 | -28 | 25  | 183 | 275 | 952  |
|                                                |    | Mildly thick     | 327 | 369 | -62 | 100 | 200 | 500 | 1378 |
|                                                |    | Moderately thick | 451 | 356 | -33 | 133 | 400 | 701 | 967  |
|                                                |    | Extremely thick  | 641 | 506 | -70 | 200 | 634 | 984 | 1655 |
| Hyoid-Burst-to-<br>UES-Opening<br>Interval(ms) | ms | Thin             | 102 | 61  | -37 | 67  | 100 | 133 | 200  |
|                                                |    | Slightly thick   | 115 | 76  | -33 | 67  | 133 | 167 | 234  |
|                                                |    | Mildly thick     | 134 | 82  | 0   | 100 | 133 | 167 | 262  |
|                                                |    | Moderately thick | 193 | 66  | 67  | 167 | 167 | 234 | 300  |
|                                                |    | Extremely thick  | 191 | 57  | 97  | 150 | 200 | 234 | 304  |
| UES Opening<br>Duration                        | ms | Thin             | 488 | 95  | 300 | 434 | 467 | 534 | 671  |
|                                                |    | Slightly thick   | 470 | 89  | 339 | 400 | 450 | 534 | 634  |
|                                                |    | Mildly thick     | 470 | 95  | 367 | 400 | 434 | 500 | 701  |
|                                                |    | Moderately thick | 407 | 77  | 267 | 367 | 400 | 467 | 567  |
|                                                |    | Extremely thick  | 399 | 76  | 267 | 367 | 400 | 434 | 601  |

|                    |                      |                  |     |     |     |     |     |     |      |
|--------------------|----------------------|------------------|-----|-----|-----|-----|-----|-----|------|
| Time-to-LVC        | ms                   | Thin             | 151 | 131 | -50 | 67  | 133 | 200 | 470  |
|                    |                      | Slightly thick   | 153 | 96  | 38  | 100 | 133 | 200 | 437  |
|                    |                      | Mildly thick     | 167 | 131 | 33  | 100 | 133 | 200 | 457  |
|                    |                      | Moderately thick | 194 | 78  | 100 | 133 | 167 | 234 | 400  |
|                    |                      | Extremely thick  | 180 | 61  | 67  | 133 | 200 | 234 | 270  |
| LVC Duration       | ms                   | Thin             | 542 | 224 | 254 | 434 | 500 | 601 | 1051 |
|                    |                      | Slightly thick   | 510 | 174 | 305 | 400 | 467 | 542 | 929  |
|                    |                      | Mildly thick     | 496 | 166 | 300 | 400 | 467 | 509 | 867  |
|                    |                      | Moderately thick | 453 | 112 | 334 | 367 | 434 | 500 | 734  |
|                    |                      | Extremely thick  | 462 | 138 | 300 | 400 | 434 | 500 | 874  |
| Vallecular Residue | %(C2-4) <sup>2</sup> | Thin             | 1%  | 1%  | 0%  | 0%  | 0%  | 1%  | 3%   |
|                    |                      | Slightly thick   | 1%  | 1%  | 0%  | 0%  | 1%  | 1%  | 5%   |
|                    |                      | Mildly thick     | 1%  | 1%  | 0%  | 0%  | 0%  | 1%  | 3%   |
|                    |                      | Moderately thick | 0%  | 1%  | 0%  | 0%  | 0%  | 1%  | 3%   |
|                    |                      | Extremely thick  | 0%  | 0%  | 0%  | 0%  | 0%  | 0%  | 2%   |

|                          |                       |                  |    |    |    |    |    |    |    |
|--------------------------|-----------------------|------------------|----|----|----|----|----|----|----|
| Pyriform Sinus Residue   | % (C2-4) <sup>2</sup> | Thin             | 1% | 1% | 0% | 0% | 0% | 1% | 4% |
|                          |                       | Slightly thick   | 1% | 1% | 0% | 0% | 0% | 1% | 4% |
|                          |                       | Mildly thick     | 1% | 1% | 0% | 0% | 0% | 1% | 3% |
|                          |                       | Moderately thick | 0% | 1% | 0% | 0% | 0% | 0% | 2% |
|                          |                       | Extremely thick  | 0% | 1% | 0% | 0% | 0% | 0% | 2% |
| Other Pharyngeal Residue | % (C2-4) <sup>2</sup> | Thin             | 0% | 0% | 0% | 0% | 0% | 0% | 1% |
|                          |                       | Slightly thick   | 0% | 0% | 0% | 0% | 0% | 0% | 1% |
|                          |                       | Mildly thick     | 0% | 1% | 0% | 0% | 0% | 0% | 2% |
|                          |                       | Moderately thick | 0% | 0% | 0% | 0% | 0% | 0% | 1% |
|                          |                       | Extremely thick  | 0% | 1% | 0% | 0% | 0% | 0% | 2% |
| Total Pharyngeal Residue | % (C2-4) <sup>2</sup> | Thin             | 1% | 2% | 0% | 0% | 1% | 2% | 7% |
|                          |                       | Slightly thick   | 2% | 3% | 0% | 0% | 1% | 2% | 8% |
|                          |                       | Mildly thick     | 2% | 2% | 0% | 0% | 1% | 3% | 6% |
|                          |                       | Moderately thick | 1% | 1% | 0% | 0% | 0% | 1% | 5% |
|                          |                       | Extremely thick  | 1% | 1% | 0% | 0% | 0% | 1% | 5% |

|                                               |                       |                  |     |    |     |     |     |     |     |
|-----------------------------------------------|-----------------------|------------------|-----|----|-----|-----|-----|-----|-----|
| Pharyngeal Area<br>at Maximum<br>Constriction | % (C2-4) <sup>2</sup> | Thin             | 3%  | 3% | 0%  | 0%  | 2%  | 3%  | 9%  |
|                                               |                       | Slightly thick   | 3%  | 2% | 0%  | 1%  | 2%  | 3%  | 8%  |
|                                               |                       | Mildly thick     | 4%  | 5% | 0%  | 1%  | 2%  | 4%  | 11% |
|                                               |                       | Moderately thick | 2%  | 3% | 0%  | 0%  | 1%  | 2%  | 7%  |
|                                               |                       | Extremely thick  | 1%  | 2% | 0%  | 0%  | 0%  | 3%  | 6%  |
| UES Diameter                                  | % (C2-4)              | Thin             | 26% | 8% | 14% | 20% | 25% | 28% | 47% |
|                                               |                       | Slightly thick   | 24% | 8% | 14% | 18% | 21% | 26% | 46% |
|                                               |                       | Mildly thick     | 24% | 8% | 12% | 18% | 22% | 28% | 44% |
|                                               |                       | Moderately thick | 19% | 4% | 13% | 15% | 18% | 21% | 28% |
|                                               |                       | Extremely thick  | 20% | 6% | 14% | 16% | 19% | 24% | 32% |

p5 = 5<sup>th</sup> percentile (p25, p50, p75, p95 = 25<sup>th</sup>, 50<sup>th</sup>, 75<sup>th</sup>, 95<sup>th</sup> percentiles); ml = milliliters; ms = milliseconds; LVC = Laryngeal Vestibule Closure; UES = Upper Esophageal Sphincter; %(C2-4)<sup>2</sup> = percent of the squared length of the C2-4 cervical spine; %(C2-4) = percent of the length of the C2-4 cervical spine; N/A = not available.

Supplementary Table 3. Descriptive statistics for videofluoroscopic measures of swallowing in participants with Parkinson Disease.

| <b><u>Parameter</u></b>            | <b><u>Unit</u></b>    | <b><u>Consistency</u></b> | <b><u>Mean</u></b> | <b><u>Standard<br/>Deviation</u></b> | <b><u>p25</u></b> | <b><u>p50</u></b> | <b><u>p75</u></b> |
|------------------------------------|-----------------------|---------------------------|--------------------|--------------------------------------|-------------------|-------------------|-------------------|
| Sip Volume                         | ml                    | Thin                      | 11                 | 8                                    | 6                 | 11                | 15                |
|                                    |                       | Slightly thick            | 11                 | 8                                    | 6                 | 12                | 16                |
|                                    |                       | Mildly thick              | 12                 | 9                                    | 8                 | 13                | 15                |
|                                    |                       | Moderately thick          | 5                  | 5                                    | 4                 | 6                 | 7                 |
|                                    |                       | Extremely thick           | 7                  | 5                                    | 5                 | 6                 | 9                 |
| Number of Swallows per Bolus       | Number                | Thin                      | 1                  | 1                                    | 1                 | 1                 | 2                 |
|                                    |                       | Slightly thick            | 1                  | 1                                    | 1                 | 1                 | 1                 |
|                                    |                       | Mildly thick              | 1                  | 1                                    | 1                 | 1                 | 1                 |
|                                    |                       | Moderately thick          | 1                  | 1                                    | 1                 | 1                 | 1                 |
|                                    |                       | Extremely thick           | 1                  | 1                                    | 1                 | 1                 | 1                 |
| Penetration-Aspiration Scale Score | Categorical Score 1-8 | Thin                      | N/A                | N/A                                  | 1                 | 1                 | 2                 |
|                                    |                       | Slightly thick            | N/A                | N/A                                  | 1                 | 1                 | 2                 |
|                                    |                       | Mildly thick              | N/A                | N/A                                  | 1                 | 1                 | 1                 |
|                                    |                       | Moderately thick          | N/A                | N/A                                  | 1                 | 1                 | 1                 |
|                                    |                       | Extremely thick           | N/A                | N/A                                  | 1                 | 1                 | 1                 |

|                                          |                             |                  |     |     |          |          |          |
|------------------------------------------|-----------------------------|------------------|-----|-----|----------|----------|----------|
| Worst Penetration-Aspiration Scale Score | Categorical Score 1-8       | Thin             | N/A | N/A | 1        | 1        | 2        |
|                                          |                             | Slightly thick   | N/A | N/A | 1        | 1        | 2        |
|                                          |                             | Mildly thick     | N/A | N/A | 1        | 1        | 1        |
|                                          |                             | Moderately thick | N/A | N/A | 1        | 1        | 1        |
|                                          |                             | Extremely thick  | N/A | N/A | 1        | 1        | 1        |
| LVC Integrity                            | Complete/Partial/Incomplete | Thin             | N/A | N/A | Complete | Complete | Complete |
|                                          |                             | Slightly thick   | N/A | N/A | Complete | Complete | Complete |
|                                          |                             | Mildly thick     | N/A | N/A | Complete | Complete | Complete |
|                                          |                             | Moderately thick | N/A | N/A | Complete | Complete | Complete |
|                                          |                             | Extremely thick  | N/A | N/A | Complete | Complete | Complete |
| Swallow Reaction Time                    | ms                          | Thin             | 278 | 182 | 100      | 256      | 423      |
|                                          |                             | Slightly thick   | 253 | 123 | 75       | 178      | 384      |
|                                          |                             | Mildly thick     | 393 | 123 | 56       | 133      | 589      |
|                                          |                             | Moderately thick | 512 | 212 | 89       | 295      | 879      |
|                                          |                             | Extremely thick  | 508 | 258 | 56       | 322      | 934      |
| Hyoid-Burst-to-UES-Opening Interval(ms)  | ms                          | Thin             | 110 | 88  | 89       | 111      | 145      |
|                                          |                             | Slightly thick   | 126 | 93  | 92       | 128      | 181      |
|                                          |                             | Mildly thick     | 126 | 99  | 100      | 122      | 156      |
|                                          |                             | Moderately thick | 144 | 116 | 104      | 128      | 183      |
|                                          |                             | Extremely thick  | 147 | 115 | 111      | 122      | 200      |



|                      |                      |                  |     |     |     |     |     |
|----------------------|----------------------|------------------|-----|-----|-----|-----|-----|
| UES Opening Duration | ms                   | Thin             | 533 | 505 | 489 | 523 | 578 |
|                      |                      | Slightly thick   | 506 | 469 | 475 | 500 | 559 |
|                      |                      | Mildly thick     | 485 | 442 | 434 | 478 | 567 |
|                      |                      | Moderately thick | 466 | 420 | 434 | 484 | 523 |
|                      |                      | Extremely thick  | 444 | 401 | 378 | 445 | 523 |
| Time-to-LVC          | ms                   | Thin             | 181 | 85  | 100 | 245 | 289 |
|                      |                      | Slightly thick   | 151 | -14 | 117 | 211 | 295 |
|                      |                      | Mildly thick     | 136 | 16  | 100 | 211 | 245 |
|                      |                      | Moderately thick | 189 | 152 | 122 | 200 | 245 |
|                      |                      | Extremely thick  | 180 | 149 | 133 | 200 | 211 |
| LVC Duration         | ms                   | Thin             | 574 | 469 | 489 | 523 | 689 |
|                      |                      | Slightly thick   | 573 | 410 | 487 | 545 | 623 |
|                      |                      | Mildly thick     | 564 | 440 | 445 | 534 | 601 |
|                      |                      | Moderately thick | 499 | 415 | 406 | 506 | 653 |
|                      |                      | Extremely thick  | 496 | 409 | 400 | 478 | 589 |
| Vallecular Residue   | %(C2-4) <sup>2</sup> | Thin             | 0%  | 0%  | 0%  | 0%  | 1%  |
|                      |                      | Slightly thick   | 0%  | 0%  | 0%  | 0%  | 1%  |
|                      |                      | Mildly thick     | 1%  | 0%  | 0%  | 0%  | 1%  |
|                      |                      | Moderately thick | 0%  | 0%  | 0%  | 0%  | 0%  |
|                      |                      | Extremely thick  | 1%  | 0%  | 0%  | 0%  | 1%  |

|                                         |              |                  |    |    |    |    |    |
|-----------------------------------------|--------------|------------------|----|----|----|----|----|
| Pyriform Sinus Residue                  | $\%(C2-4)^2$ | Thin             | 0% | 0% | 0% | 0% | 0% |
|                                         |              | Slightly thick   | 0% | 0% | 0% | 0% | 0% |
|                                         |              | Mildly thick     | 1% | 0% | 0% | 0% | 0% |
|                                         |              | Moderately thick | 0% | 0% | 0% | 0% | 0% |
|                                         |              | Extremely thick  | 0% | 0% | 0% | 0% | 0% |
| Other Pharyngeal Residue                | $\%(C2-4)^2$ | Thin             | 0% | 0% | 0% | 0% | 0% |
|                                         |              | Slightly thick   | 0% | 0% | 0% | 0% | 0% |
|                                         |              | Mildly thick     | 0% | 0% | 0% | 0% | 0% |
|                                         |              | Moderately thick | 0% | 0% | 0% | 0% | 0% |
|                                         |              | Extremely thick  | 0% | 0% | 0% | 0% | 0% |
| Total Pharyngeal Residue                | $\%(C2-4)^2$ | Thin             | 1% | 0% | 0% | 0% | 1% |
|                                         |              | Slightly thick   | 1% | 0% | 0% | 0% | 1% |
|                                         |              | Mildly thick     | 2% | 0% | 0% | 0% | 1% |
|                                         |              | Moderately thick | 1% | 0% | 0% | 0% | 0% |
|                                         |              | Extremely thick  | 1% | 0% | 0% | 0% | 1% |
| Pharyngeal Area at Maximum Constriction | $\%(C2-4)^2$ | Thin             | 2% | 1% | 0% | 1% | 3% |
|                                         |              | Slightly thick   | 2% | 1% | 1% | 2% | 4% |
|                                         |              | Mildly thick     | 3% | 1% | 1% | 2% | 5% |
|                                         |              | Moderately thick | 2% | 1% | 0% | 2% | 3% |
|                                         |              | Extremely thick  | 2% | 1% | 0% | 1% | 3% |

|              |          |                  |     |     |     |     |     |
|--------------|----------|------------------|-----|-----|-----|-----|-----|
| UES Diameter | % (C2-4) | Thin             | 17% | 14% | 13% | 16% | 21% |
|              |          | Slightly thick   | 19% | 15% | 14% | 19% | 22% |
|              |          | Mildly thick     | 19% | 17% | 17% | 19% | 21% |
|              |          | Moderately thick | 16% | 14% | 12% | 16% | 18% |
|              |          | Extremely thick  | 18% | 16% | 13% | 18% | 24% |

---

P25 = 25<sup>th</sup> percentile (p50, p75 = 50<sup>th</sup>, 75<sup>th</sup> percentiles); ml = milliliters; ms = milliseconds; LVC = Laryngeal Vestibule Closure; UES = Upper Esophageal Sphincter; % (C2-4)<sup>2</sup> = percent of the squared length of the C2-4 cervical spine; % (C2-4) = percent of the length of the C2-4 cervical spine; N/A = not available.
